# Supplementary material for: A single source k-shortest paths algorithm to infer regulatory pathways in a gene network
Source: PubMed Central journal article supplement — Bioinformatics. 2012 Jun 9;28(12):i49–58. doi: 10.1093/bioinformatics/bts212 (PMC3371844; doi:10.1093/bioinformatics/bts212), 2012-06-09
Supplement: supp_bts212_Parthasarathy_25_sup_1.pdf [file supp_bts212_Parthasarathy_25_sup_1.pdf]

# A single-source k shortest paths algorithm to infer regulatory pathways in a gene network - Supplementary Material

Yu-Keng Shih and Srinivasan Parthasarathy

## List of Figures

- 1 The sorted e-values of the top GO term in  $GO_{ann}$  with different  $\lambda$ . . . . . 2

## List of Tables

- 1 The number of gold standards found by the  $k$  diverse paths algorithm with a significantly less e-value of a GO term in  $GO_{ann}$  . . . . . 2
- 2 The e-values of some enriched GO terms found by  $k = 5$  diverse short paths algorithm with different  $\lambda$ . . . . . 2
- 3 The top 10 genes and their corresponding paths found when  $\lambda = 0$  and 1.0. The starting node is RTS1. . . . . 3

(a) UNKNOWNCAUSAL using different  $\lambda$ .

(b) UNKNOWNTARGET using different  $\lambda$ .

Figure 1: The sorted e-values of the top GO term in  $GO_{ann}$  with different  $\lambda$ .  $k = 5$ .

Table 1: The number of gold standards found by the  $k$  diverse paths algorithm with a significantly less e-value of a GO term in  $GO_{ann}$  than the  $k$ -shortest paths algorithm ( $\lambda = 0$ ).  $k = 5$ .

|                  |            |                  |            |
|------------------|------------|------------------|------------|
| $\lambda = 0.25$ | <b>33</b>  | $\lambda = 0.75$ | <b>445</b> |
| $\lambda = 0.5$  | <b>167</b> | $\lambda = 1.0$  | <b>604</b> |

Table 2: Case study - other examples: The e-values of some enriched GO terms found by  $k = 5$  diverse short paths algorithm with different  $\lambda$ . E-values larger than 0.01 are denoted by “-“, representing insignificance.

| GO number           | function name                           | $\lambda = 0$   | $\lambda = 0.25$ | $\lambda = 0.5$ | $\lambda = 0.75$ | $\lambda = 1.0$ |
|---------------------|-----------------------------------------|-----------------|------------------|-----------------|------------------|-----------------|
| Starting node: CMD1 |                                         |                 |                  |                 |                  |                 |
| GO:0000780          | condensed nuclear chromosome...         | 3.32E-3         | 2.61E-3          | 5.72E-4         | 2.43E-5          | <b>8.51E-7</b>  |
| *GO:0005934         | cellular bud tip                        | -               | -                | -               | -                | <b>1.61E-4</b>  |
| *GO:0006606         | protein import into nucleus             | 5.28E-5         | 6.50E-5          | 1.55E-5         | 1.23E-8          | -               |
| GO:0010499          | proteasomal ubiquitin-independent ...   | 1.42E-11        | <b>1.39E-11</b>  | 4.05E-9         | -                | -               |
| *GO:0031023         | microtubule organizing center ...       | <b>1.98E-9</b>  | 3.58E-9          | 2.55E-8         | 4.80E-8          | 3.20 E-8        |
| *GO:0034504         | protein localization in nucleus         | -               | -                | 1.02E-5         | 6.73E-9          | <b>4.08E-12</b> |
| Starting node: RRP6 |                                         |                 |                  |                 |                  |                 |
| GO:0000462          | maturation of SSU-rRNA ...              | 3.00E-11        | 2.26E-11         | 5.42E-12        | 4.38E-4          | -               |
| *GO:0000466         | maturation of 5.8S rRNA ...             | <b>1.46E-31</b> | 2.18E-31         | 1.67E-31        | 1.37E-21         | 6.20E-20        |
| GO:0008094          | DNA-dependent ATPase activity           | -               | -                | -               | 3.53E-3          | <b>4.92E-5</b>  |
| *GO:0031126         | snoRNA 3'-end processing                | <b>1.10E-25</b> | 2.27E-25         | 3.58E-25        | 1.76E-19         | 1.25E-20        |
| Starting node: BUB3 |                                         |                 |                  |                 |                  |                 |
| *GO:0000777         | condensed chromosome kinetochore        | 2.53E-35        | 4.50E-35         | <b>2.51E-36</b> | 1.55E-3          | 5.03E-5         |
| *GO:0007091         | mitotic metaphase/anaphase transition   | <b>9.36E-21</b> | 1.67E-20         | 3.62E-18        | 7.30E-7          | 2.66E-11        |
| GO:0016251          | general RNA polymerase II transcription | -               | -                | -               | <b>2.73E-9</b>   | -               |
| GO:0031145          | anaphase-promoting complex-...          | 8.45E-13        | <b>7.77E-13</b>  | 3.19E-11        | -                | 4.19E-4         |
| *GO:0033597         | mitotic checkpoint complex              | 3.20E-4         | 8.94E-4          | 5.67E-3         | 1.05E-3          | <b>6.11E-5</b>  |

\*These GO terms are in  $GO_{ann}$ , i.e., they annotate the starting node.

Table 3: The top 10 genes and their corresponding paths found when  $\lambda = 0$  and 1.0. The starting node is RTS1.

| $\lambda = 0$   |                                                                                                                                         |          |                                                                                                                                                 |
|-----------------|-----------------------------------------------------------------------------------------------------------------------------------------|----------|-------------------------------------------------------------------------------------------------------------------------------------------------|
| 1.PPH21         | RTS1 → PPH21<br>RTS1 → RRD2 → PPH21<br>RTS1 → SGO1 → PPH21<br>RTS1 → RRD2 → TAP24 → PPH21<br>RTS1 → RRD2 → TPD3 → PPH21                 | 6.PPH22  | RTS1 → RRD2 → PPH22<br>RTS1 → SGO1 → PPH22<br>RTS1 → PPH21 → RRD2 → PPH22<br>RTS1 → RRD2 → TAP24 → PPH22<br>RTS1 → RRD2 → TPD3 → PPH22          |
| 2.RRD2          | RTS1 → RRD2<br>RTS1 → PPH21 → RRD2<br>RTS1 → PPH21 → TAP24 → RRD2<br>RTS1 → SGO1 → PPH21 → RRD2<br>RTS1 → SGO1 → TPD3 → RRD2            | 7.SIT4   | RTS1 → RRD2 → SIT4<br>RTS1 → PPH21 → RRD2 → SIT4<br>RTS1 → PPH21 → TOR2 → SIT4<br>RTS1 → RRD2 → TAP24 → SIT4<br>RTS1 → PPH21 → RRD1 → SIT4      |
| 3.SGO1          | RTS1 → SGO1<br>RTS1 → PPH21 → SGO1<br>RTS1 → RRD2 → PPH21 → SGO1<br>RTS1 → RRD2 → TPD3 → SGO1<br>RTS1 → RRD2 → PPH22 → SGO1             | 8.RRD1   | RTS1 → PPH21 → RRD1<br>RTS1 → RRD2 → TAP24 → RRD1<br>RTS1 → RRD2 → SIT4 → RRD1<br>RTS1 → RRD2 → PPH21 → RRD1<br>RTS1 → RRD2 → TPD3 → RRD1       |
| 4.TPD3          | RTS1 → RRD2 → TPD3<br>RTS1 → SGO1 → TPD3<br>RTS1 → PPH21 → TPD3<br>RTS1 → PPH21 → RRD2 → TPD3<br>RTS1 → PPH21 → RRD1 → TPD3             | 9.TOR2   | RTS1 → PPH21 → TOR2<br>RTS1 → RRD2 → TAP24 → TOR2<br>RTS1 → RRD2 → SIT4 → TOR2<br>RTS1 → RRD2 → PPH21 → TOR2<br>RTS1 → PPH21 → TAP24 → TOR2     |
| 5.TAP24         | RTS1 → RRD2 → TAP24<br>RTS1 → PPH21 → TAP24<br>RTS1 → PPH21 → RRD2 → TAP24<br>RTS1 → PPH21 → TOR2 → TAP24<br>RTS1 → RRD2 → SIT4 → TAP24 | 10.CDC55 | RTS1 → PPH21 → CDC55<br>RTS1 → RRD2 → PPH21 → CDC55<br>RTS1 → RRD2 → TPD3 → CDC55<br>RTS1 → RRD2 → PPH22 → CDC55<br>RTS1 → PPH21 → ZDS2 → CDC55 |
| $\lambda = 1.0$ |                                                                                                                                         |          |                                                                                                                                                 |
| 1.PPH21         | RTS1 → PPH21<br>RTS1 → RRD2 → PPH21<br>RTS1 → SGO1 → PPH21                                                                              | 6.TAP24  | RTS1 → RRD2 → TAP24<br>RTS1 → PPH21 → TAP24                                                                                                     |
| 2.RRD2          | RTS1 → RRD2<br>RTS1 → PPH21 → RRD2<br>RTS1 → SGO1 → TPD3 → RRD2                                                                         | 7.ZDS2   | RTS1 → PPH21 → ZDS2<br>RTS1 → RRD2 → TPD3 → ZDS2<br>RTS1 → SGO1 → TPD3 → CDC55 → ZDS2                                                           |
| 3.SGO1          | RTS1 → SGO1<br>RTS1 → PPH21 → SGO1<br>RTS1 → RRD2 → TPD3 → SGO1                                                                         | 8.PPH22  | RTS1 → RRD2 → PPH22<br>RTS1 → SGO1 → PPH22                                                                                                      |
| 4.TPD3          | RTS1 → RRD2 → TPD3<br>RTS1 → SGO1 → TPD3<br>RTS1 → PPH21 → TPD3                                                                         | 9.SIT4   | RTS1 → RRD2 → SIT4<br>RTS1 → PPH21 → TOR2 → SIT4<br>RTS1 → PPH21 → TOR2 → SIT4                                                                  |
| 5.CDC55         | RTS1 → PPH21 → CDC55<br>RTS1 → RRD2 → TPD3 → CDC55<br>RTS1 → SGO1 → PPH22 → CDC55                                                       | 10.TOR2  | RTS1 → PPH21 → TOR2<br>RTS1 → RRD2 → TAP24 → TOR2                                                                                               |
